# Supplementary material
Source: publisher figshare collection journal article supplement (https://gsapubs.figshare.com/articles/dataset/_/25620768)
Supplement: Supplementary file 1 [file 45698394]

Silleni, A., Giordano, G., Ort, M.H., and Isaia, R., 2024, Transport and deposition of the 39.8 ka Campanian Ignimbrite large-scale pyroclastic density currents (Italy): GSA Bulletin, <https://doi.org/10.1130/B37500.1>.

## Supplemental Material

### *The isopach map*

The isopach map was developed based on published data, fieldwork and the assessment of the paleotopographic control on thickness distribution. A database composed of published data and 97 outcrops from fieldwork was developed. The 0-m isopach was reconstructed through a first phase of revision of geological maps (Servizio Geologico d'Italia, 1963, 1965, 1966, 1967, 1971a, 1971b, 1975; ISPRA, 2009, 2010, 2011a, 2011b, 2011c, 2011d, 2014a, 2014b, 2016, 2018). The contact to distinguish the 0-m isopach was traced between the CI and older units and extrapolated where CI does not crop out. Then a statistical and morphological analysis of the actual slope of the top of the CI was applied to discriminate if the ignimbrite is covered by younger deposits or the CI was never emplaced there, and a comparison between the topography and the average slope of the CI top was carried out.

To determine the isopach locations, two different methods were used, one in the flat topographic zone (from the caldera to the base of the Apennine Mountains, including all the Campanian Plain) and one in the ridge topographic zone, farther from the vent. The almost complete lack of outcrops in the Campanian Plain and the valley-ponded depositional style in the ridge-valley topography of the Apennine Mountains (Rosi et al., 1996; Perrotta et al., 2010; Scarpati et al., 2015; Fedele et al., 2016; Silleni et al., 2020) make these different approaches necessary.

In the flat topographic zone, data from the literature (Ortolani and Aprile, 1985; Scandone et al., 1991; Bellucci, 1994; Rolandi et al., 2003; Milia and Torrente, 2007; Torrente et al., 2010; ISPRA, 2011d), consisting of more than 300 thickness values of CI from boreholes, outcrops, and geological sections, were used to fit isopachs on the map. In the distal area, the isopach locations were based upon our field observations and the reconstruction of the pre-CI topography. A series of profiles orthogonal to the center of the valley in the Apennine Mountains was drawn to outline the trend of the valleys. The base elevation of the paleovalleys is constrained by field data where the CI base has been measured. For greater detail on the method, see Silleni et al. (2020).

*Methods*

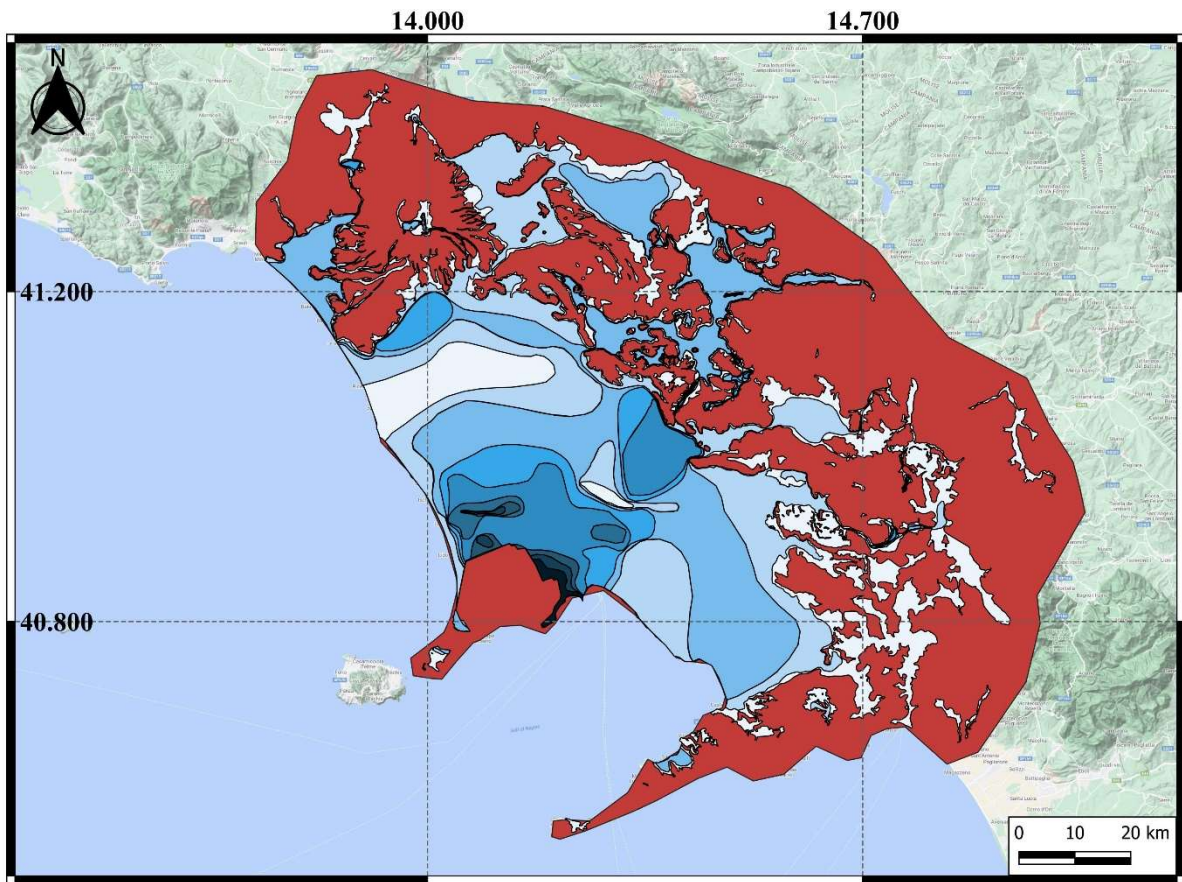

*Figure S1. Enveloped area of the Campanian Ignimbrite deposit.*

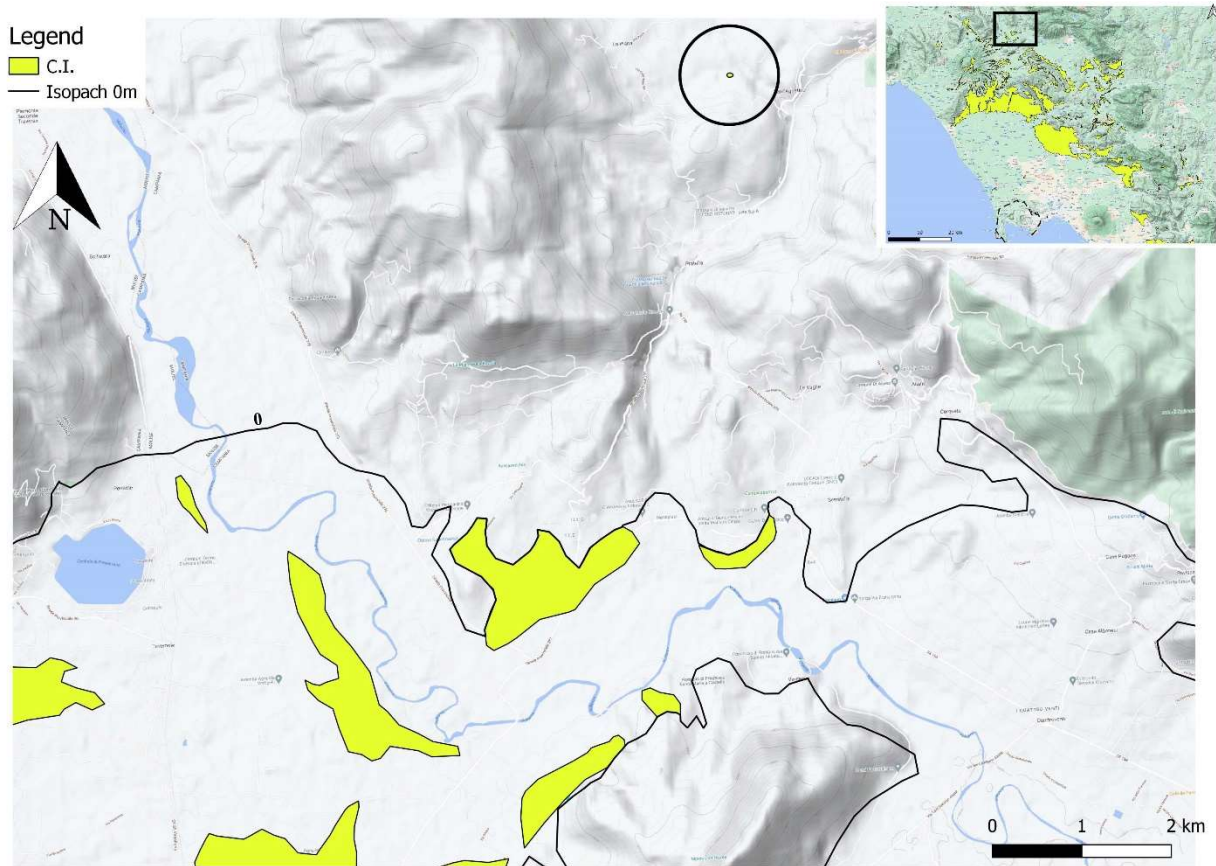

**Figure S2.** *Outcrop of Pratella. The outcrop is an example of the small outcrops found in secondary valleys updating the data published in Silleni et al. (2020).*

The center of the caldera was chosen as the vent area to consider a common starting point for all paths (as the final runout point is the most important, the real location of the emission point of the PDC, i.e. at the caldera center or the caldera rim, is not relevant for this work).

The database of hydrographic basins used in this work was initially larger (53 basins instead of 40), but many of the basins have an area between 6 and 8 km<sup>2</sup>. Because we compare the features to basin size, we did not want the data to be affected by this sampling bias. Therefore, half of the basins with this area (13 basins) were selected randomly using a Matlab code and included in our dataset. This operation was repeated five times and results were compared for any deviations (none were found; this database variability is shown in detail later in this supplementary material), so the final database used in this work is the first produced by the code (Fig. S1).

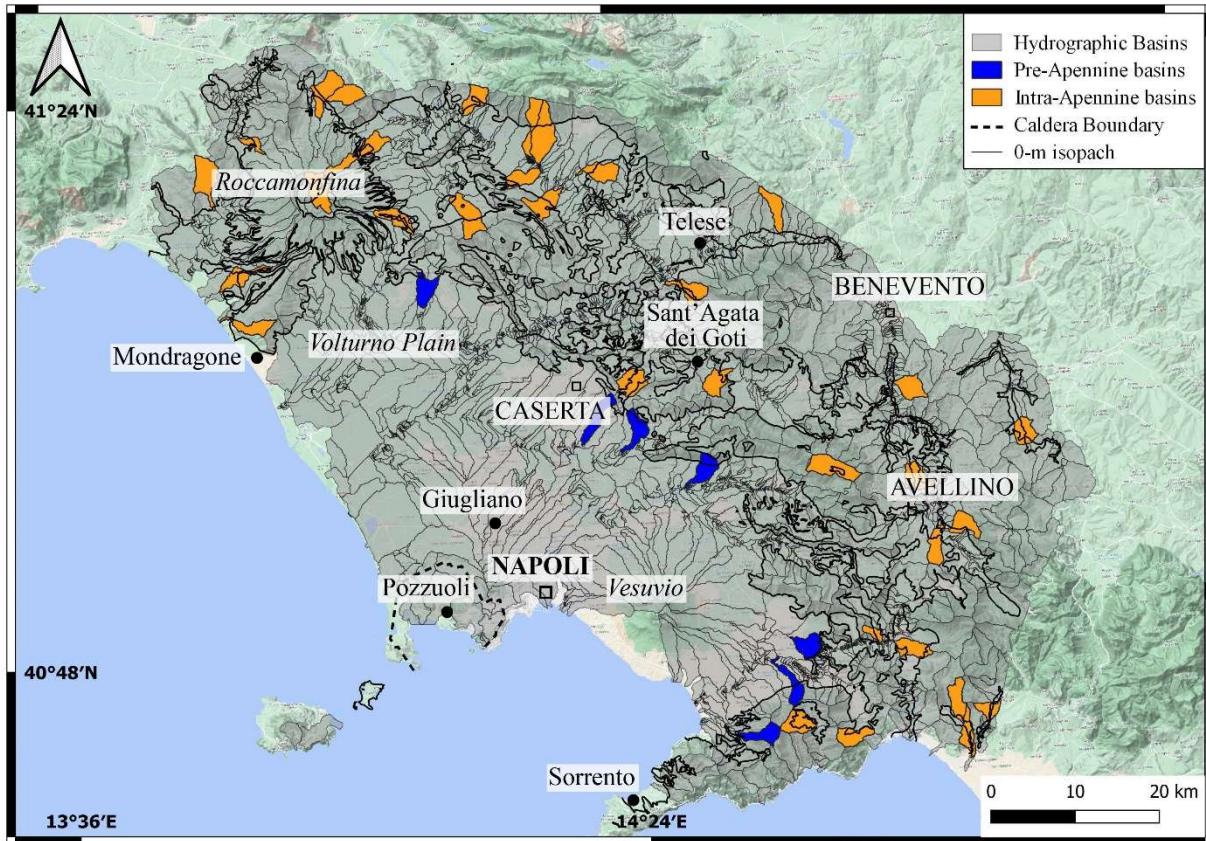

**Figure S3.** Hydrographic catchment areas of the Campanian region, among the Campanian Ignimbrite extent, in light gray and the relation to the 0-m isopach drawn on it (solid black line). The analyzed basins located before the first Apennine ridge, and thus the first subjected to blocking, are shown in blue (pre-Apennine basins), while the other analyzed basins (beyond the first ridge) are shown in orange (intra-Apennine basins).

*Results: the topological aspect ratio (ART)*

The ART has been calculated along flow paths that extend from the vent to the Apennine ridges in a straight line, called “primary” (A, B, C, D, E, F, G) (Fig. S2), and flow paths that arrived at the same final runout points, but with a sinuous, valley-constrained path, here called “secondary” (A’, B’, C’, C’, D’, E’, F’, G’).

The plot of primary paths (Fig. S2) presents some points with ART equal to 0 in areas on the Apennine ridge where there is no outcrop (if the thickness is 0 m, the ART is 0). The plotted potential runouts reach less than 70 km, although there are CI distal outcrops, not considered by these paths, up to almost 80 km from the vent. The ART gradient shows a variety of patterns, but all of them present a first general flat trend on the Campanian Plain before the Apennines (pre-blocking area), which means that the changes in thickness are negligible compared to the high potential runout, then a gradient decrease of at least one order of magnitude, near the ridge, and finally an increase until the final runout (post-blocking area). This simple trend is clear in paths B,

C, E, and F (Fig. S2), while it is more complex in the other paths, where there are some irregularities in the gradient.

The secondary path plots show continuous lines due to the positive values of thickness, as the paths were traced along the valleys, following areas with CI deposits, included by the 0-m isopach (Fig. S3). Primary and secondary paths (A-A', B-B', C-C'-C'', D-D', E-E', F-F', G-G') have comparable ART trends with small differences in some cases (paths A-A', D-D', F-F', Fig. S3). In other cases, the trends look different, as for the paths E and E'. All the paths, both primary and secondary, show the starting flat trend corresponding to the Campanian Plain and a final increase of the ART gradients in the final runout (post-blocking area). In Fig. S4, path F-F' has been chosen to show all gradient variations, from the vent to the final runout.

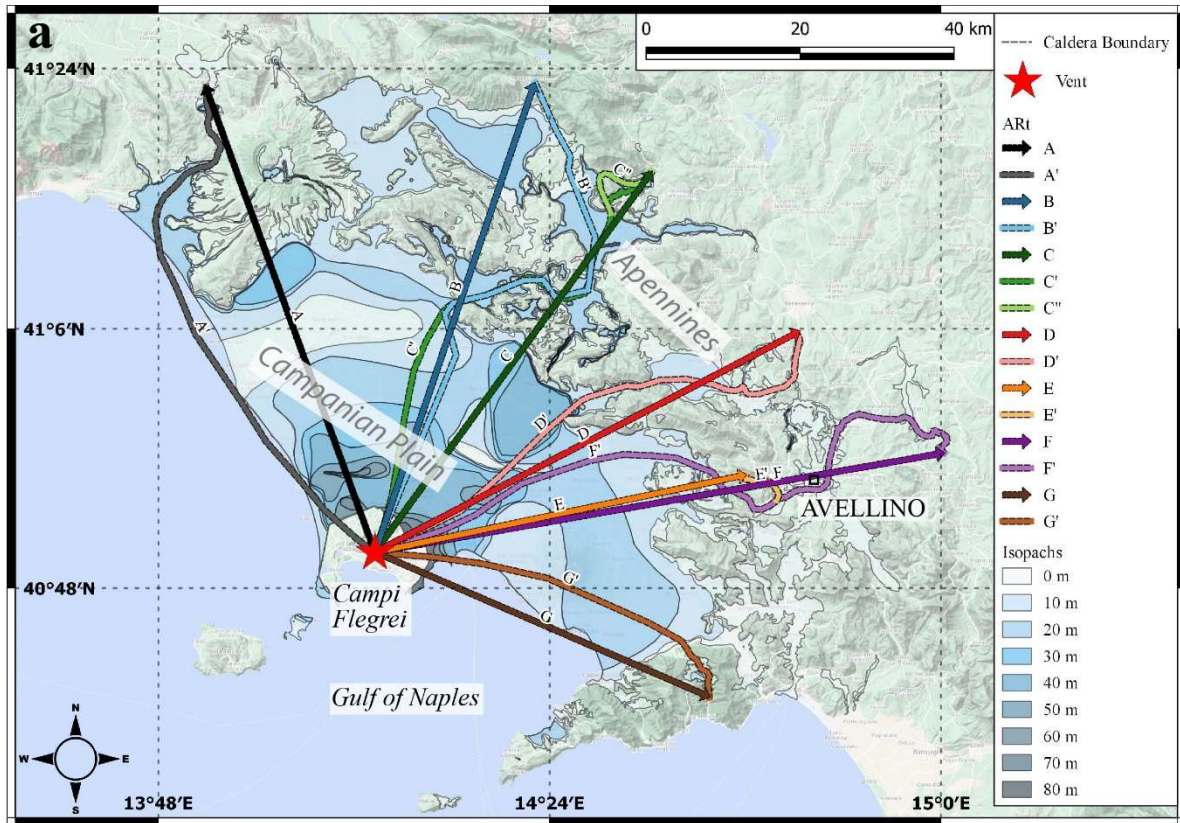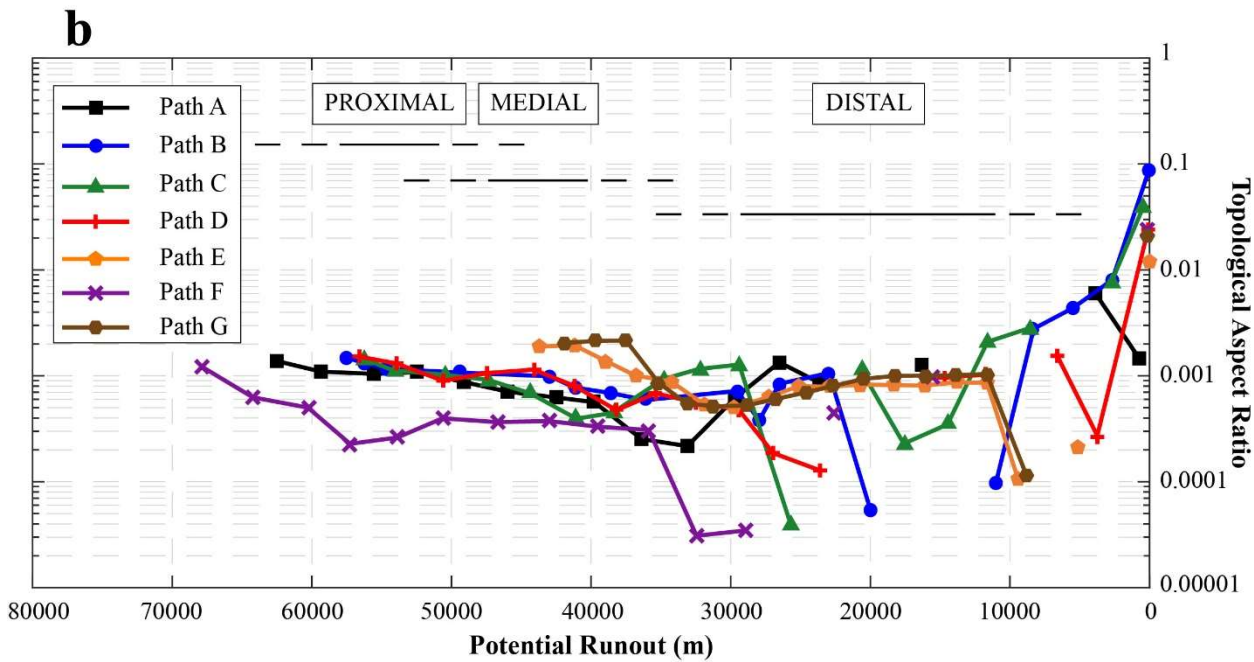

**Figure S4.** Topological aspect ratio (ARt) of the Campanian Ignimbrite. a) Isopach map (in m, thicknesses in light blue) with paths along which ARt has been calculated. Each track goes from the vent (red star) out to the final runout, following a straight path (primary paths: A, B, C, D, E, F, G) or the bottom of the valleys (secondary paths: A', B', C', D', E', F', G'). b) Plot of the ARt vs. the potential runout of the primary paths. All paths show a starting flat ARt gradient.

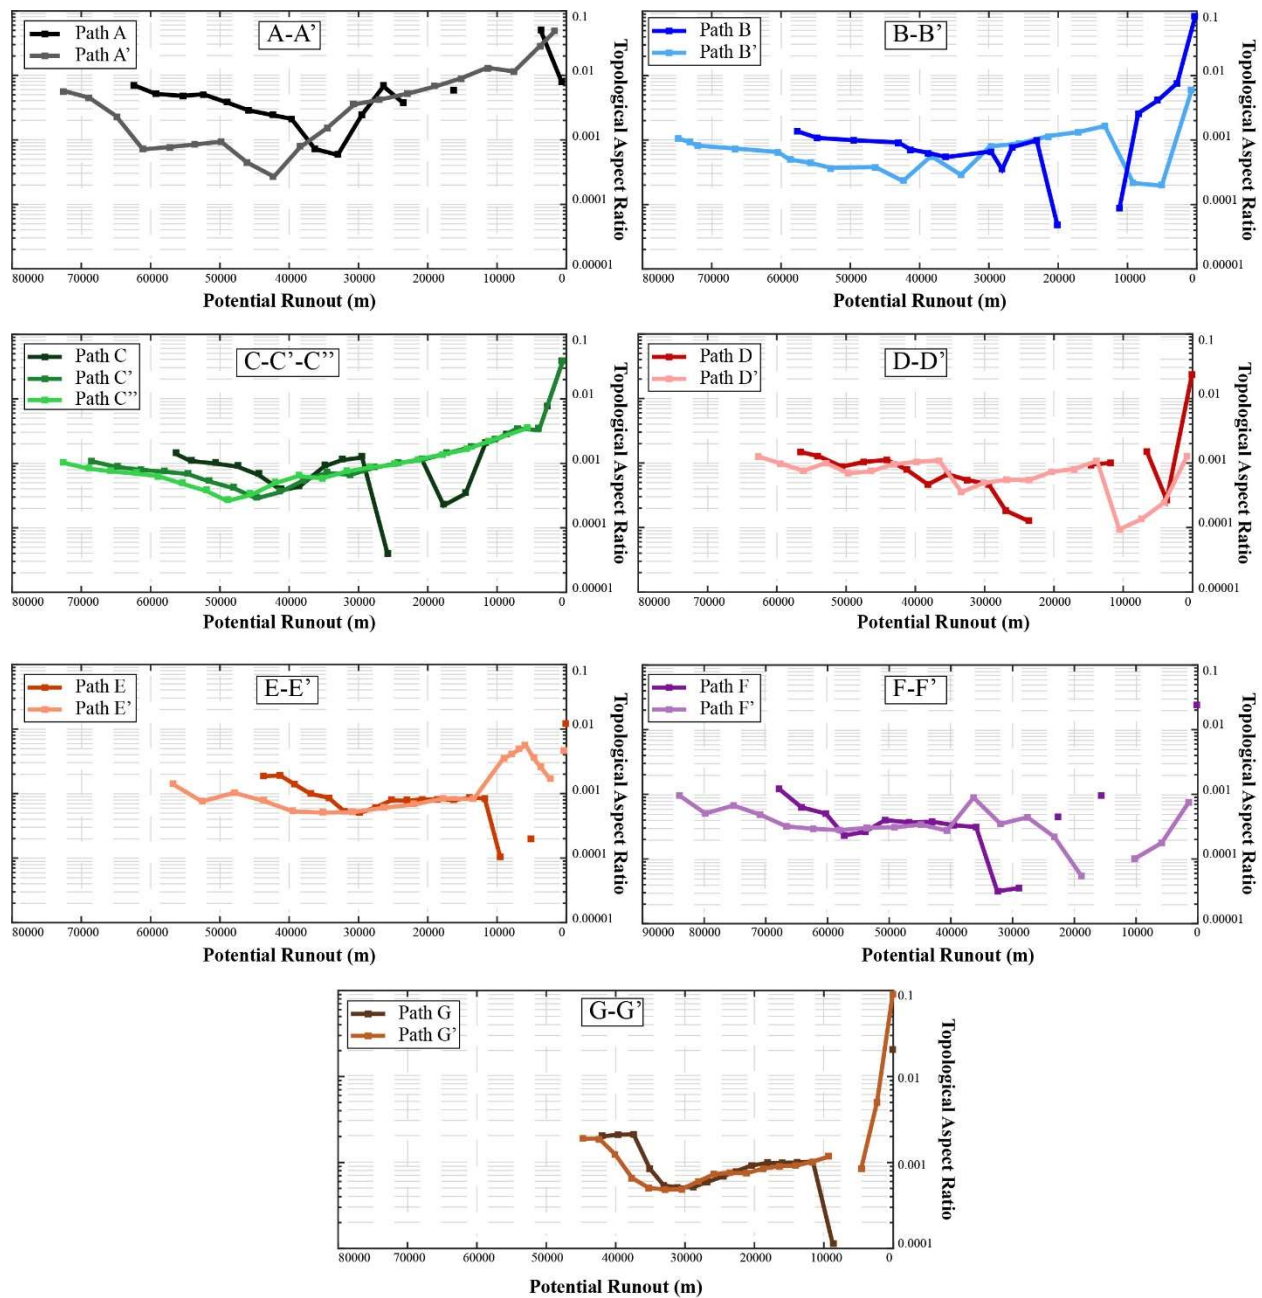

**Figure S5.** Plot of topological aspect ratio versus potential runout. Comparison between primary paths in darker colors and secondary paths in lighter colors (A-A', B-B', C-C'-C'', D-D', E-E', F-F', G-G').

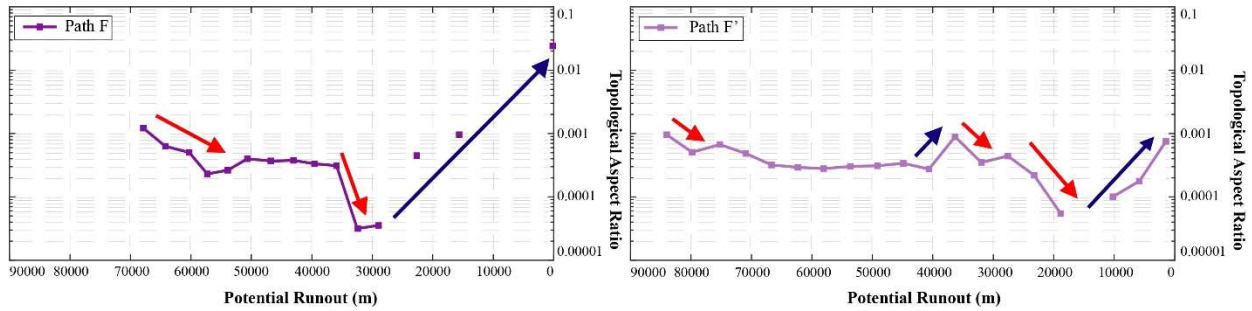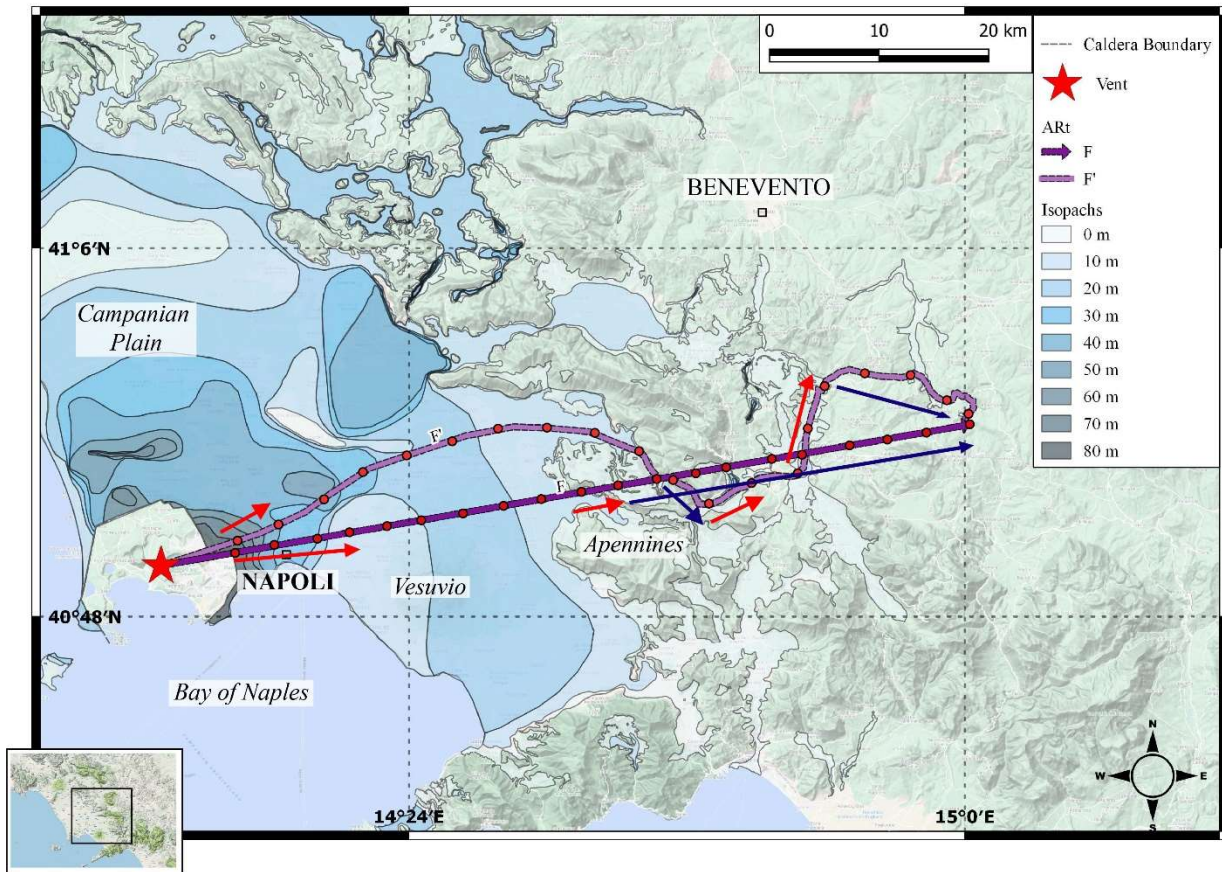

**Figure S6.** Relation between the topological aspect ratio ( $ART$ ) and the topography for the paths  $F$  and  $F'$ . The flat gradient corresponds to the flat area of Campanian Plain. Path  $F$  has a decrease of the  $ART$  gradient due to the Apennine foothills whereas path  $F'$  shows some variations due to the interaction with the topography. Both paths have a final increase of the  $ART$  gradient.



*Discussion: the Competence Ratio (CR)*

Detailed results of the Competence Ratio (CR) of all paths analyzed in this work are in Table S1.

**Table S1.** Distance (km) from the vent of the maximum pumice (MP5) and maximum lithic (ML5) (cm), and the competence ratio (CR), respectively, for pumice (CRp) and lithic clasts (CRI) for all paths. CR is related to the potential final runout of 73 km (see main text for the definition).

| <b>Path A</b>        |                 |                    |
|----------------------|-----------------|--------------------|
| <b>Distance (km)</b> | <b>ML5 (cm)</b> | <b>CRI (cm/km)</b> |
| 6.2                  | 5.16            | 0.07               |
| 12.3                 | 5               | 0.07               |
| 14.8                 | 10              | 0.14               |
| 38.3                 | 3.5             | 0.05               |
| 39.4                 | 2.5             | 0.03               |
| 39                   | 3               | 0.04               |
| 40.5                 | 1.3             | 0.02               |
| 42                   | 0.9             | 0.01               |
| 43                   | 1.9             | 0.03               |
| 43.2                 | 1               | 0.01               |
| 46.8                 | 0.9             | 0.01               |
| 47.1                 | 1.5             | 0.02               |
| 48.6                 | 0.9             | 0.01               |
| 56.3                 | 0.1             | 0.00               |
| 56.6                 | 0.1             | 0.00               |
| 56.8                 | 1.2             | 0.02               |
| 58.1                 | 1               | 0.01               |
| 60.8                 | 0.1             | 0.00               |
| 61.1                 | 0.1             | 0.00               |
| 61.6                 | 0.7             | 0.01               |
| <b>Distance (km)</b> | <b>MP5 (cm)</b> | <b>CRp (cm/km)</b> |
| 6.2                  | 29.4            | 0.40               |
| 12.3                 | 8.36            | 0.11               |
| 15                   | 68              | 0.93               |
| 37.5                 | 19.1            | 0.26               |
| 38.4                 | 19              | 0.26               |
| 38.5                 | 20              | 0.27               |
| 39.5                 | 14.6            | 0.20               |
| 40.6                 | 14              | 0.19               |
| 42                   | 6.8             | 0.09               |
| 42.2                 | 11.8            | 0.16               |
| 42.9                 | 10              | 0.14               |
| 43.1                 | 4.5             | 0.06               |
| 46.8                 | 4               | 0.05               |

|      |      |      |
|------|------|------|
| 47.1 | 4.5  | 0.06 |
| 48.6 | 4    | 0.05 |
| 56.9 | 4.9  | 0.07 |
| 57.5 | 5    | 0.07 |
| 61.1 | 1.54 | 0.02 |
| 61.6 | 2.3  | 0.03 |
| 62.6 | 1.8  | 0.02 |

---

**Path B**

| <b>Distance (km)</b> | <b>ML5 (cm)</b> | <b>CRI (cm/km)</b> |
|----------------------|-----------------|--------------------|
| 6.2                  | 5.16            | 0.07               |
| 31.2                 | 4.6             | 0.06               |
| 32.8                 | 2.5             | 0.03               |
| 33.3                 | 3               | 0.04               |
| 34.8                 | 0.1             | 0.00               |
| 35.6                 | 3.9             | 0.05               |
| 37.4                 | 0.8             | 0.01               |
| 40.1                 | 1.4             | 0.02               |
| 41.4                 | 1               | 0.01               |
| 46                   | 0.6             | 0.01               |

| <b>Distance (km)</b> | <b>MP5 (cm)</b> | <b>CRp (cm/km)</b> |
|----------------------|-----------------|--------------------|
| 6.2                  | 29.4            | 0.40               |
| 30.8                 | 23.8            | 0.33               |
| 31.4                 | 26              | 0.36               |
| 33                   | 20              | 0.27               |
| 33.3                 | 9               | 0.12               |
| 34.8                 | 15              | 0.21               |
| 35.6                 | 13              | 0.18               |
| 37.4                 | 2.5             | 0.03               |
| 40.1                 | 5.3             | 0.07               |
| 45.6                 | 5               | 0.07               |
| 46                   | 1.5             | 0.02               |

---

**Path C**

| <b>Distance (km)</b> | <b>ML5 (cm)</b> | <b>CRI (cm/km)</b> |
|----------------------|-----------------|--------------------|
| 5                    | 17              | 0.23               |
| 29.6                 | 3               | 0.04               |
| 29.8                 | 2.8             | 0.04               |
| 30.3                 | 2.8             | 0.04               |
| 31                   | 1.82            | 0.02               |
| 31.5                 | 3.2             | 0.04               |
| 34.4                 | 4               | 0.05               |
| 35.1                 | 1.7             | 0.02               |
| 35.7                 | 3               | 0.04               |
| 38.1                 | 0.6             | 0.01               |

|      |      |      |
|------|------|------|
| 43.2 | 1.5  | 0.02 |
| 45.4 | 2.5  | 0.03 |
| 49.9 | 0.8  | 0.01 |
| 50.2 | 1.4  | 0.02 |
| 54   | 1.1  | 0.02 |
| 54.7 | 1    | 0.01 |
| 55.6 | 0.38 | 0.01 |
| 56.2 | 0.9  | 0.01 |
| 59.5 | 0.8  | 0.01 |

| Distance (km) | MP5 (cm) | CRp (cm/km) |
|---------------|----------|-------------|
| 5             | 29.8     | 0.41        |
| 29.6          | 30       | 0.41        |
| 30            | 24       | 0.33        |
| 30.5          | 19       | 0.26        |
| 31            | 19.8     | 0.27        |
| 31.6          | 21       | 0.29        |
| 34.1          | 20       | 0.27        |
| 35.3          | 18.3     | 0.25        |
| 38.3          | 3.7      | 0.05        |
| 43.3          | 4.9      | 0.07        |
| 45.4          | 9.1      | 0.12        |
| 49.9          | 1        | 0.01        |
| 52.5          | 5        | 0.07        |
| 53.3          | 1.06     | 0.01        |
| 54.1          | 3.4      | 0.05        |
| 56.3          | 2.1      | 0.03        |
| 59            | 9        | 0.12        |
| 59.3          | 0.6      | 0.01        |
| 59.7          | 4.9      | 0.07        |

**Path D**

| Distance (km) | ML5 (cm) | CRI (cm/km) |
|---------------|----------|-------------|
| 5             | 17       | 0.23        |
| 6.5           | 17       | 0.23        |
| 34.8          | 3        | 0.04        |
| 55.1          | 0.46     | 0.01        |
| 55.4          | 1.4      | 0.02        |
| 55.5          | 1        | 0.01        |
| 56            | 0.8      | 0.01        |

| Distance (km) | MP5 (cm) | CRp (cm/km) |
|---------------|----------|-------------|
| 5             | 29.8     | 0.41        |
| 6.5           | 16.2     | 0.22        |
| 12.2          | 79       | 1.08        |
| 34.8          | 20       | 0.27        |

|      |      |      |
|------|------|------|
| 46.7 | 5    | 0.07 |
| 54.1 | 5    | 0.07 |
| 55.1 | 3.48 | 0.05 |
| 55.7 | 4.2  | 0.06 |
| 56   | 4.5  | 0.06 |

---

**Path E**

| <b>Distance (km)</b> | <b>ML5 (cm)</b> | <b>CRI (cm/km)</b> |
|----------------------|-----------------|--------------------|
| 5                    | 17              | 0.23               |
| 6.5                  | 17              | 0.23               |
| 9.5                  | 10.4            | 0.14               |
| 12.1                 | 10.6            | 0.15               |
| 14.4                 | 27.8            | 0.38               |
| 40.6                 | 3               | 0.04               |
| 42.2                 | 1               | 0.01               |
| 42.6                 | 1               | 0.01               |
| 46.5                 | 0.9             | 0.01               |
| 47.8                 | 1               | 0.01               |

| <b>Distance (km)</b> | <b>MP5 (cm)</b> | <b>CRp (cm/km)</b> |
|----------------------|-----------------|--------------------|
| 5                    | 29.8            | 0.41               |
| 6.5                  | 16.2            | 0.22               |
| 9.5                  | 44.6            | 0.61               |
| 12.2                 | 79              | 1.08               |
| 14.4                 | 86.6            | 1.19               |
| 37                   | 20              | 0.27               |
| 37.3                 | 20              | 0.27               |
| 41.1                 | 5               | 0.07               |
| 41.5                 | 5               | 0.07               |
| 46.8                 | 1.84            | 0.03               |
| 47.7                 | 2.5             | 0.03               |
| 49.6                 | 3.3             | 0.05               |

---

**Path F**

| <b>Distance (km)</b> | <b>ML5 (cm)</b> | <b>CRI (cm/km)</b> |
|----------------------|-----------------|--------------------|
| 5                    | 17              | 0.23               |
| 6.5                  | 17              | 0.23               |
| 9.5                  | 10.4            | 0.14               |
| 14.4                 | 27.8            | 0.38               |
| 40.3                 | 3               | 0.04               |
| 40.6                 | 3               | 0.04               |
| 42.2                 | 1               | 0.01               |
| 42.6                 | 1               | 0.01               |
| 46.8                 | 0.9             | 0.01               |
| 47.8                 | 1               | 0.01               |
| 49.6                 | 0.9             | 0.01               |

|                      |                 |                    |
|----------------------|-----------------|--------------------|
| 57.8                 | 1.7             | 0.02               |
| 58.5                 | 1.5             | 0.02               |
| <b>Distance (km)</b> | <b>MP5 (cm)</b> | <b>CRp (cm/km)</b> |
| 5                    | 29.8            | 0.41               |
| 6.5                  | 16.2            | 0.22               |
| 9.5                  | 44.6            | 0.61               |
| 14.4                 | 86.6            | 1.19               |
| 37                   | 20              | 0.27               |
| 37.3                 | 20              | 0.27               |
| 41.1                 | 5               | 0.07               |
| 41.5                 | 5               | 0.07               |
| 46.8                 | 1.84            | 0.03               |
| 47.7                 | 2.5             | 0.03               |
| 50.5                 | 3.32            | 0.05               |
| 57.8                 | 3.5             | 0.05               |
| 58.5                 | 3.4             | 0.05               |

**Path G**

|                      |                 |                    |
|----------------------|-----------------|--------------------|
| <b>Distance (km)</b> | <b>ML5 (cm)</b> | <b>CRI (cm/km)</b> |
| 9.5                  | 10.4            | 0.14               |
| 37.7                 | 3               | 0.04               |
| 46.2                 | 1.08            | 0.01               |
| 47                   | 1.9             | 0.03               |
| <b>Distance (km)</b> | <b>MP5 (cm)</b> | <b>CRp (cm/km)</b> |
| 36.5                 | 20              | 0.27               |
| 46.2                 | 4               | 0.05               |
| 46.9                 | 8.2             | 0.11               |
| 47.6                 | 3.1             | 0.04               |
| 47.9                 | 8.1             | 0.11               |

*Sample location*

**Table S2.** Data on outcrop locations: ID, site name, latitude, longitude, altitude, observed units and observed thickness for each outcrop.

| <b>ID</b> | <b>Site name</b>                    | <b>Latitude (°)</b> | <b>Longitude (°)</b> | <b>Altitude (m) a.s.l.</b> | <b>Units</b>     | <b>Observed Thickness (m)</b> |
|-----------|-------------------------------------|---------------------|----------------------|----------------------------|------------------|-------------------------------|
| 1         | Stop 1 - Mignano<br>Montelungo      | 41.40661            | 13.98082             | 95                         | WGI              | 8                             |
| 2         | Stop 2 - Mignano<br>Montelungo      | 41.40628            | 13.98121             | 100                        | USAF, WGI        | 1                             |
| 3         | Stop 3 - Mignano<br>Montelungo      | 41.40629            | 13.98113             | 110                        | USAF, WGI        | 1                             |
| 4         | Stop 4 -<br>Roccamonfina            | 41.28944            | 13.99278             | 540                        | GL, USAF,<br>WGI | 50                            |
| 5         | Stop 5 -<br>Roccamonfina            | 41.28952            | 13.99265             | 560                        | WGI              | 4                             |
| 6         | Stop 6 - Sessa<br>Aurunca           | 41.24711            | 13.93903             | 185                        | WGI              | 12                            |
| 7         | Ponte Sant'Agata                    | 41.22863            | 13.93258             | 139                        | WGI              | 30                            |
| 8         | SP14                                | 41.27269            | 13.9621              | 545                        | WGI              | 25                            |
| 9         | Stop 7 - Tavola                     | 41.29957            | 14.00002             | 610                        | USAF, WGI        | 2                             |
| 10        | Stop 8 - Torano A                   | 41.27172            | 13.99416             | 440                        | WGI              | 1                             |
| 11        | Stop 8 - Torano B                   | 41.269              | 14.04052             | 461                        | GL, USAF,<br>WGI | 30                            |
| 12        | Stop 9 - Furnolo                    | 41.27165            | 13.99404             | 301                        | GL, USAF,<br>WGI | 2                             |
| 13        | Stop 10 - Furnolo                   | 41.26993            | 14.0419              | 300                        | WGI              | 35                            |
| 14        | Comune Mignano<br>Montelungo        | 41.40541            | 13.98322             | 130                        | WGI              | 6                             |
| 15        | Stop 11 - Sant'Angelo<br>in Formis  | 41.12139            | 14.25682             | 57                         | USAF, WGI        | 15                            |
| 16        | Stop 12 - Triflisco                 | 41.1362             | 14.25528             | 34                         | WGI              | 5                             |
| 17        | Stop 13 - Pontelatone<br>A          | 41.18584            | 14.25546             | 83                         | WGI              | 1                             |
| 18        | Stop 13 - Pontelatone<br>B          | 41.1854             | 14.25557             | 81                         | WGI              | 5                             |
| 19        | Stop 14 - Pontelatone               | 41.18474            | 14.2553              | 78                         | USAF, WGI        | 5                             |
| 20        | Stop 15 - Pontelatone<br>SP189      | 41.1906             | 14.25493             | 98                         | WGI              | 7                             |
| 21        | Stop 16 - Ruviano                   | 41.20994            | 14.4079              | 78                         | WGI              | 2                             |
| 22        | Stop 17 - Ruviano                   | 41.20936            | 14.40745             | 70                         | WGI              | 21                            |
| 23        | Stop 18 - San<br>Salvatore Telesino | 41.23581            | 14.47714             | 104                        | WGI              | 2                             |

|    |                       |          |          |     |           |    |
|----|-----------------------|----------|----------|-----|-----------|----|
| 24 | Stop 19 - Puglianello | 41.22433 | 14.4464  | 62  | WGI       | 3  |
| 25 | Telese terme          | 41.22982 | 14.53457 | 116 | WGI       | 2  |
| 26 | Ruviano 1             | 41.21043 | 14.41082 | 57  | WGI       | 5  |
| 27 | Ruviano Fosso         | 41.21167 | 14.41127 | 63  | WGI       | 8  |
| 28 | Ruviano 2             | 41.21055 | 14.41012 | 64  | WGI       | 3  |
|    | Stop 20 - San         |          |          |     |           |    |
| 29 | Lorenzello            | 41.26985 | 14.53162 | 190 | USAF, WGI | 19 |
|    | Stop 21 - San         |          |          |     |           |    |
| 30 | Lorenzello            | 41.2692  | 14.53801 | 214 | WGI       | 9  |
| 31 | Stop 22 - Amorosi     | 41.20903 | 14.45779 | 60  | WGI       | 2  |
| 32 | Stop 23 - Casagiove   | 41.08671 | 14.30732 | 67  | WGI       | 7  |
| 33 | San Lorenzello        | 41.26818 | 14.53105 | 196 | WGI       | 15 |
|    | San Lorenzello -      |          |          |     |           |    |
| 34 | Cerreto               | 41.27637 | 14.55113 | 232 | WGI       | 5  |
|    | San Lorenzello        |          |          |     |           |    |
| 35 | Ristorante            | 41.2685  | 14.52962 | 191 | WGI       | 10 |
| 36 | Stop 24 - Casagiove   | 41.08662 | 14.30278 | 65  | WGI       | 14 |
| 37 | Stop 25 - Gradillo    | 41.12394 | 14.33669 | 166 | WGI       | 24 |
| 38 | Casagiove SS700       | 41.08747 | 14.30406 | 74  | WGI       | 6  |
| 39 | Gradillo              | 41.12054 | 14.33908 | 193 | WGI       | 2  |
| 40 | Ruviano 3             | 41.20775 | 14.40391 | 75  | WGI       | 3  |
| 41 | Ruviano 4             | 41.20849 | 14.40651 | 70  | WGI       | 13 |
| 42 | Ruviano 5             | 41.21053 | 14.41048 | 57  | WGI       | 11 |
| 43 | Ruviano - Cimitero    | 41.21192 | 14.42011 | 60  | WGI       | 1  |
| 44 | Ruviano 6             | 41.21258 | 14.42225 | 60  | WGI       | 3  |
| 45 | Stop 26 - Maddaloni   | 41.04716 | 14.37956 | 62  | LYT       | 1  |
| 46 | Cava abbandonata      | 41.06373 | 14.34691 | 56  | LYT       | 5  |
| 47 | Stop 27 - Caserta     | 41.06161 | 14.3455  | 53  | LYT       | 4  |
| 48 | Stop 28 - Sant'Anna   | 41.09116 | 14.44714 | 62  | LYT       | 15 |
| 49 | SP121                 | 41.09902 | 14.46894 | 84  | LYT       | 20 |
| 50 | Stop 29 - Capellino   | 41.09769 | 14.48696 | 112 | LYT       | 53 |
|    | Ponte Sant'Agata dei  |          |          |     |           |    |
| 51 | Goti                  | 41.08902 | 14.50297 | 148 | WGI       | 40 |
| 52 | Stop 30 - Durazzano   | 41.06417 | 14.45702 | 264 | WGI       | 3  |
|    | Sant'Agata dei Goti   |          |          |     |           |    |
| 53 | top                   | 41.10065 | 14.50719 | 142 | WGI       | 0  |
| 54 | Stop 31 - San Pietro  | 41.09956 | 14.50764 | 126 | WGI       | 43 |
| 55 | Stop 32 - Castrone    | 41.09163 | 14.51141 | 147 | LYT       | 3  |
|    | Stop 33 - Sant'Agata  |          |          |     | USAF, GL, |    |
| 56 | dei Goti              | 41.09217 | 14.50656 | 107 | WGI       | 35 |
|    | Stop 34 - Sant'Agata  |          |          |     |           |    |
| 57 | dei Goti              | 41.09167 | 14.50894 | 123 | WGI, LYT  | 35 |
| 58 | SP121 bis             | 41.10215 | 14.46956 | 84  | LYT       | 2  |

|    |                       |          |          |     |            |    |
|----|-----------------------|----------|----------|-----|------------|----|
|    | Stop 35 - Tocco       |          |          |     |            |    |
| 59 | Caudio                | 41.12213 | 14.62599 | 485 | LYT        | 1  |
| 60 | Stop 36 - Tufara      | 41.05936 | 14.71026 | 198 | PPF, WGI   | 20 |
|    | Stop 37 - Altavilla   |          |          |     |            |    |
| 61 | Irpina B              | 41.00774 | 14.76531 | 260 | LYT        | 20 |
|    |                       |          |          |     | PPF, GL,   |    |
|    | Stop 37 - Altavilla   |          |          |     | USAF, WGI, |    |
| 62 | Irpina A              | 41.00714 | 14.76552 | 244 | LYT        | 5  |
|    | Lungofiume -          |          |          |     |            |    |
| 63 | Altavilla Irpina      | 41.00604 | 14.76601 | 222 | WGI, LYT   | 14 |
|    | Stop 38 - Monteforte  |          |          |     |            |    |
| 64 | Irpino                | 40.91418 | 14.67142 | 444 | LYT        | 14 |
| 65 | Stop 39 - Verdolino   | 40.85522 | 14.20769 | 153 | PP, BM     | 50 |
|    | Stop 40 - Monte di    |          |          |     |            |    |
| 66 | Procida               | 40.791   | 14.04602 | 0   | PP, BM     | 3  |
|    | Stop 41 -             |          |          |     |            |    |
| 67 | Mondragone            | 41.12515 | 13.91096 | 30  | WGI        | 80 |
| 68 | SS430 A               | 41.31125 | 13.89634 | 19  | WGI        | 12 |
| 69 | SS430 B               | 41.30749 | 13.89466 | 18  | WGI        | 12 |
| 70 | Stop 42 - Mortola     | 41.34702 | 13.88266 | 23  | WGI        | 10 |
| 71 | Stop 43 - Mortola 2   | 41.34902 | 13.88048 | 31  | WGI        | 3  |
|    | Stop 44 - Punta       |          |          |     |            |    |
| 72 | Marmolite             | 40.89635 | 14.13634 | 64  | BM         | 7  |
|    |                       |          |          |     | PPF, GL,   |    |
| 73 | Stop 45 - Acqua Fidia | 40.92923 | 14.70025 | 958 | USAF, WGI  | 3  |
| 74 | Piano Acqua Fidia     | 40.92281 | 14.7134  | 804 | WGI        | 2  |
| 75 | Cerreto Sannita       | 41.31006 | 14.53653 | 246 | WGI        | 1  |
| 76 | Stop 46 - Civitella   | 41.31012 | 14.5368  | 258 | WGI        | 1  |
| 77 | Stop 47 - Procida     | 40.76473 | 14.03531 | 0   | BM         | 7  |
|    | Stop 39 - Verdolino   |          |          |     |            |    |
| 78 | B                     | 40.85571 | 14.20621 | 145 | PP, LPFU   | 80 |
| 79 | Stop 48 - Pianura     | 40.85935 | 14.18551 | 195 | PP         | 10 |
|    | Stop 49 - Vigna S.    |          |          |     | PPF, USAF, |    |
| 80 | Martino 1             | 40.84231 | 14.24247 | 76  | BM         | 8  |
|    | Stop 50 - Vigna S.    |          |          |     |            |    |
| 81 | Martino 2             | 40.84301 | 14.24311 | 175 | BM, UPFU   | 3  |
|    | Stop 51 - Vigna S.    |          |          |     |            |    |
| 82 | Martino 3             | 40.84373 | 14.24292 | 152 | PP         | 3  |
| 83 | Stop 52 - Baiano      | 40.91548 | 14.66762 | 400 | PPF        |    |
| 84 | Stop 53 - Cuma        | 40.84895 | 14.05028 | 55  | BM, LPFU   | 20 |
| 85 | Stop 54 - Lago Patria | 40.93363 | 14.05399 | 37  | WGI, BM    | 5  |
| 86 | Stop 55 - Le Campole  | 41.23112 | 14.24032 | 583 | WGI        | 1  |
| 87 | Stop 56 - Liberi      | 41.22711 | 14.30978 | 421 | WGI        | 1  |



|     |                       |          |          |     |                        |    |
|-----|-----------------------|----------|----------|-----|------------------------|----|
| 88  | Stop 57 - Statigliano | 41.27991 | 14.24541 | 275 | WGI                    | 1  |
| 89  | Stop 58 - Sant'Anna   | 40.77986 | 14.65101 | 124 | WGI                    | 10 |
|     | Stop 59 - Paterno     |          |          |     |                        |    |
| 90  | Sant'Arcangelo        | 40.67639 | 14.64385 | 167 | WGI                    | 5  |
| 91  | Stop 60 - Polvica     | 40.69385 | 14.63513 | 278 | WGI                    | 4  |
| 92  | Stop 61 - Monticchio  | 40.59983 | 14.35433 | 312 | PPF, WGI               | 18 |
|     | Stop 62 - Piano di    |          |          |     |                        |    |
| 93  | Sorrento              | 40.6369  | 14.40127 | 18  | WGI, LYT               | 25 |
|     | Stop 63 - Fosso di    |          |          |     |                        |    |
| 94  | Prepezzano            | 40.69748 | 14.88704 | 128 | WGI                    | 3  |
| 95  | Stop 64 - Cologna     | 40.72163 | 14.7763  | 154 | WGI                    | 1  |
|     | Stop 65 - Serino      |          |          |     |                        |    |
| 96  | Cimitero              | 40.86696 | 14.85831 | 365 | PPF, WGI               | 1  |
|     | Stop 66 - Serino      |          |          |     |                        |    |
| 97  | Ferrovia              | 40.85697 | 14.85926 | 390 | WGI                    | 2  |
|     | Stop 67 -             |          |          |     |                        |    |
|     | Sant'Angelo in        |          |          |     |                        |    |
| 98  | Formis Cava           | 41.10810 | 14.26020 | 42  | WGI, LYT<br>USAF, WGI, | 10 |
|     |                       |          |          |     | CPF                    |    |
| 99  | Stop 68 - Triflisco   | 41.13745 | 14.25312 | 35  |                        | 4  |
|     | Stop 69 - San Nicola  |          |          |     |                        |    |
| 100 | La Strada             | 41.05347 | 14.34436 | 45  | LYT<br>PPF, USAF,      | 7  |
|     |                       |          |          |     | WGI                    |    |
| 101 | Stop 70 - Voscone     | 40.79708 | 14.65742 | 83  |                        | 4  |
|     | Stop 71 - Cava        |          |          |     |                        |    |
| 102 | Zaccaria              | 40.90311 | 14.09316 | 33  | BU, UPFU               | 4  |
| 103 | Stop 72 - Trefola     | 40.89030 | 14.15922 | 128 | LPFU                   |    |
| 104 | Stop 73 - Ponti Rossi | 40.87501 | 14.26354 | 201 | BU, UPFU               | 6  |
| 105 | Stop 74 - Pratella    | 41.42347 | 14.18476 | 226 | WGI                    | 1  |

### Geometric features of the deposit – databases variability

The database of basins used in this work was initially larger (53 basins instead of 40 of the final database), but many of the basins have an area between 6 and 8 km<sup>2</sup>. Because we compare the features to basin size, we did not want the data to be affected by this sampling bias. Therefore, half of the basins with this area (13 basins) were selected randomly using a Matlab code and included in our dataset. This operation was repeated five times and results were compared for any deviations (none were found, this database variability is shown in Fig. S5), the final database used in this work is the first produced by the code.

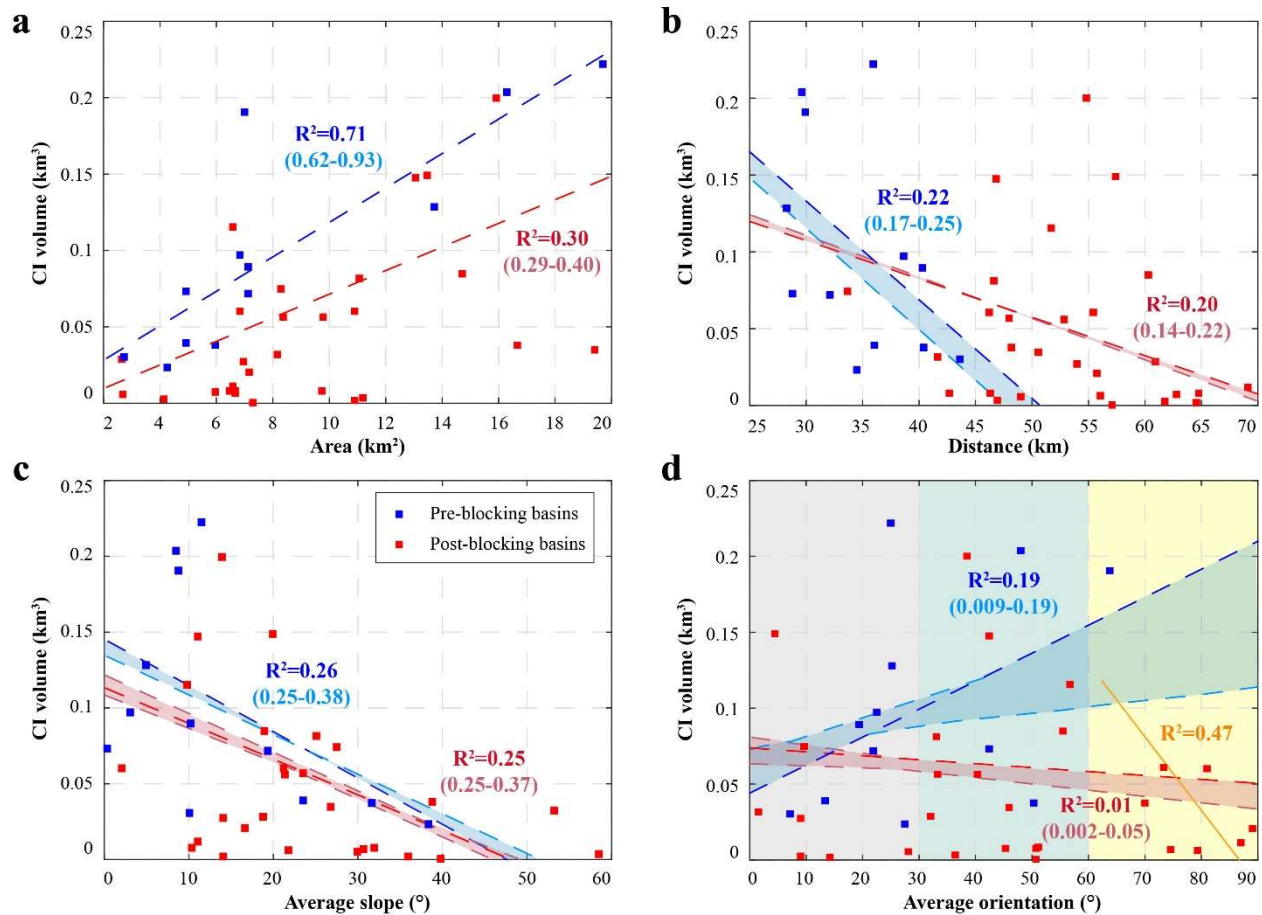

**Figure S7.** Geometric features of the deposit. Relations between the Campanian Ignimbrite (CI) volume in the basins and different features of the analyzed hydrographic basins: area (a), distance (b), slope (c), and orientation (d). The basins located on the first ridge of the Apennine, and initially subjected to blocking (pre-blocking basins), are shown in blue and the other hydrographic basins considered in this work (here called post-blocking basins) are shown in red. Fit lines are represented by dashed lines (blue and red), while databases variability is shown by light blue and pink (both for fit lines and  $R^2$ ). d) The orientation is subdivided into three different ranges (0-30° in gray, 30-60° in green, 60-90° in yellow). The solid yellow line is the fit line of the range 60-90°, with the relative  $R^2$  (0.47).

## References

- Bellucci F (1994) Nuove conoscenze stratigrafiche sui depositi vulcanici del sottosuolo del settore meridionale della piana campana. *Boll Soc Geol It* 113:395–420
- Fedele L, Scarpati C, Sparice D, Perrotta A, Laiena F (2016) A chemostratigraphic study of the Campanian Ignimbrite eruption (Campi Flegrei, Italy): Insights on magma chamber withdrawal and deposit accumulation as revealed by compositionally zoned stratigraphic and facies framework. *J Volcanol Geotherm Res* 324:105–117. <https://doi.org/10.1016/j.jvolgeores.2016.05.019>
- ISPRA (2009) Geological Map n. 432 “Benevento”; scale 1:50,000. National Geological Survey of Italy, Università degli studi di Urbino, Istituto di Geologia Applicata, Urbino, Italy.
- ISPRA (2010) Geological Map n. 431 “Caserta Est”; scale 1:50,000. National Geological Survey of Italy, Regione Campania, Settore Difesa Suolo, Napoli, Italy.
- ISPRA (2011a) Geological Map n. 465 “Isola di Procida”; scale 1:50,000. National Geological Survey of Italy, Regione Campania, Settore Difesa Suolo, Napoli, Italy.
- ISPRA (2011b) Geological Map n. 448 “Ercolano”; scale 1:50,000. National Geological Survey of Italy, CNR Consiglio Nazionale delle Ricerche, Italy.
- ISPRA - Servizio Geologico d’Italia (2011c) Progetto CARG—geological map of Italy at 1:50,000 scale. Sheets n. n. 467 Salerno. (<http://www.isprambiente.gov.it/MEDIA/carg/campania.html>)
- ISPRA (2011d) Geological Map n. 446-447 “Napoli”; scale 1:50,000. National Geological Survey of Italy, Regione Campania - Settore Difesa Suolo, Napoli, Italy.
- ISPRA (2014a) Geological Map n. 450 “S. Angelo dei Lombardi”; scale 1:50,000. National Geological Survey of Italy, CNR Consiglio Nazionale delle Ricerche, Italy.
- ISPRA (2014b) Geological Map n. 466-485 “Sorrento-Termini”; scale 1:50,000. National Geological Survey of Italy, CNR Consiglio Nazionale delle Ricerche, Italy.
- ISPRA (2016) Geological Map n. 449 “Avellino”; scale 1:50,000. National Geological Survey of Italy, Regione Campania, Italy.
- ISPRA (2018) Geological Map n. 464 “Isola d’Ischia”; scale 1:25,000. National Geological Survey of Italy, Regione Campania, Settore Difesa Suolo, Napoli, Italy.
- Milia A, Torrente MM (2007) The influence of paleogeographic setting and crustal subsidence on the architecture of ignimbrites in the Bay of Naples (Italy). *Earth Planet Sci Lett* 263:192–206. <https://doi.org/10.1016/j.epsl.2007.08.004>
- Ortolani F, Aprile F (1985) Principali caratteristiche stratigrafiche e strutturali dei depositi superficiali della piana campana. *Boll Soc Geol It* 104:195–206
- Perrotta A, Scarpati C, Luongo G, Morra V (2010) Stratigraphy and volcanological evolution of the southwestern sector of Campi Flegrei and Procida Island, Italy. *Geol Soc Am Spec Pap* 80301:171–191. [https://doi.org/10.1130/2010.2464\(09\)](https://doi.org/10.1130/2010.2464(09)).

- Rolandi G, Bellucci F, Heizler MT, Belkin HE, De Vivo B (2003) Tectonic controls on the genesis of ignimbrites from the Campanian Volcanic Zone, southern Italy. *Mineral Petrol* 79:3–31. <https://doi.org/10.1007/s00710-003-0014-4>
- Rosi M, Vezzoli L, Aleotti P, Censi M (1996) Interaction between caldera collapse and eruptive dynamics during the Campanian Ignimbrite eruption, Phlegraean Fields, Italy. *Bull Volcanol* 57:541–554. <https://doi.org/10.1007/BF00304438>
- Scandone R, Bellucci F, Lirer L, Rolandi G (1991) The structure of the Campanian Plain and the activity of the Neapolitan volcanoes (Italy). *J Volcanol Geotherm Res* 48:1–31. [https://doi.org/10.1016/0377-0273\(91\)90030-4](https://doi.org/10.1016/0377-0273(91)90030-4)
- Scarpati C, Sparice D, Perrotta A (2015) Facies variation in the Campanian Ignimbrite. *Rend Online Soc Geol Ital* 33:83–87. <https://doi.org/10.3301/ROL:2015.20>
- Servizio Geologico d'Italia (1963) Carta geologica d'Italia scala 1:100.000, foglio 174 – Ariano Irpino “Geological map of Italy at 1:100.000 scale, sheet number 174 – Ariano Irpino”. Servizio Geologico d'Italia, Rome
- Servizio Geologico d'Italia (1965) Carta geologica d'Italia scala 1:100.000, foglio 197 – Amalfi “Geological map of Italy at 1:100.000 scale, sheet number 197 – Amalfi”. Servizio Geologico d'Italia, Rome
- Servizio Geologico d'Italia (1966) Foglio Geologico n°172 - Caserta. Carta Geologica d'Italia, scala 1:100.000, II ediz., Istituto Poligrafico e Zecca dello Stato, Roma
- Servizio Geologico d'Italia (1967) Carta geologica d'Italia scala 1:100.000, fogli 160 – Cassino “Geological map of Italy at 1:100.000 scale, sheet number 160 – Cassino”. Servizio Geologico d'Italia, Rome
- Servizio Geologico d'Italia (1971a) Carta geologica d'Italia scala 1:100.000, foglio 171 – Gaeta e Vulcano di Roccamonfina “Geological map of Italy at 1:100.000 scale, sheet number 171 – Gaeta e Vulcano di Roccamonfina”. Servizio Geologico d'Italia, Rome
- Servizio Geologico d'Italia (1971b) Carta geologica d'Italia scala 1:100.000, foglio 161 – Isernia “Geological map of Italy at 1:100.000 scale, sheet number 161 – Isernia”. Servizio Geologico d'Italia, Rome
- Servizio Geologico d'Italia (1975) Carta geologica d'Italia scala 1:100.000, foglio 173 – Benevento “Geological map of Italy at 1:100.000 scale, sheet number 173 – Benevento”. Servizio Geologico d'Italia, Rome
- Silleni A, Giordano G, Isaia R, Ort MH (2020). The Magnitude of the 39.8 ka Campanian Ignimbrite Eruption, Italy: Method, Uncertainties and Errors. *Front Earth Sci* 8:543399. <https://doi.org/10.3389/feart.2020.543399>
- Torrente MM, Milia A, Bellucci F, Rolandi G (2010) Extensional tectonics in the Campania Volcanic Zone (eastern Tyrrhenian Sea, Italy): New insights into the relationship between faulting and ignimbrite eruptions. *Boll Soc Geol It* 129:297–315. <https://doi.org/10.3301/IJG.2010.07>
